# Supplementary material for: Treatment of proximal humerus fractures in the elderly: A systematic review of 409 patients
Source: PubMed Central journal article supplement — Acta Orthop. 2015 May 13;86(3):280–5. doi: 10.3109/17453674.2014.999299 (PMC4443467; doi:10.3109/17453674.2014.999299), 2015-05-13
Supplement: ORT-86-280-s7918.pdf [file ORT-86-280-s7918.pdf]

## Supplementary article data

# Treatment of proximal humerus fractures in the elderly

## A systematic review of 409 patients

Antti P LAUNONEN<sup>1</sup>, Vesa LEPOLA<sup>1</sup>, Tapio FLINKKILÄ<sup>2</sup>, Minna LAITINEN<sup>1</sup>, Mika PAAVOLA<sup>3</sup>,  
and Antti MALMIVAARA<sup>4</sup>

<sup>1</sup>Department of Orthopaedics, Tampere University Hospital, Tampere; <sup>2</sup>Department of Orthopaedics and Trauma Surgery, Oulu University Hospital, Oulu; <sup>3</sup>Department of Orthopaedics and Traumatology, Helsinki University Hospital, Helsinki; <sup>4</sup>National Institute for Health and Welfare, Helsinki, Finland.  
Correspondence: antti.launonen@pshp.fi  
Submitted 2014-08-19. Accepted 2014-11-17.

Table 4. Risk of bias: If 6 or more criteria were met, the trial was assessed as having low risk of bias. If less than 6 criteria were met, the trial was assessed to have high risk of bias

| Author         |                     | B   | C   | D  | E  | F  | G   | H   | I   | J   | K   | L   | M   | N |
|----------------|---------------------|-----|-----|----|----|----|-----|-----|-----|-----|-----|-----|-----|---|
| Zyto 1997      | Sweden              | UC  | Yes | No | No | No | Yes | Yes | Yes | Yes | UC  | Yes | Yes | 7 |
| Fialka 2008    | Austria             | UC  | UC  | No | No | No | Yes | UC  | Yes | UC  | Yes | Yes | Yes | 5 |
| Fjalestad 2010 | Norway <sup>a</sup> | Yes | Yes | No | No | No | Yes | Yes | Yes | Yes | No  | Yes | Yes | 8 |
| Olerud 2011a   | Sweden              | UC  | UC  | No | No | No | Yes | 7 |
| Olerud 2011b   | Sweden              | Yes | UC  | No | No | No | Yes | Yes | Yes | Yes | No  | Yes | Yes | 7 |
| Voigt 2011     | Germany             | No  | No  | No | No | No | UC  | Yes | Yes | UC  | No  | Yes | Yes | 4 |
| Fjalestad 2012 | Norway <sup>a</sup> | Yes | Yes | No | No | No | Yes | Yes | Yes | Yes | No  | Yes | Yes | 8 |
| Boons 2012     | Netherlands         | Yes | Yes | No | No | No | Yes | 9 |
| Carbone 2012   | Italy               | No  | No  | No | No | No | Yes | UC  | Yes | Yes | UC  | Yes | Yes | 5 |

UC = Unclear

<sup>a</sup> Both publications are from the same population.

B Was randomization adequate?

C Was treatment allocation concealed?

D Was the patient blinded to the intervention?

E Was the care provider blinded to the intervention?

F Was the outcome assessor blinded to the intervention?

G Was the drop-out rate described and acceptable?

H Was intention-to-treat carried out?

I Were all reports of the study free of suggestion of selective outcome reporting?

J Were the groups similar at baseline regarding the most important prognostic indicators?

K Were co-interventions avoided in all groups?

L Was the compliance acceptable in all groups?

M Was the timing of the outcome assessment similar in all groups?

N Total

## APPENDIX

### Database

Journals@Ovid Full Text <April 29, 2014>, Your Journals@Ovid, PsycARTICLES Full Text, The Joanna Briggs Institute EBP Database - <Current to April 23, 2014>, Ovid MEDLINE(R) In-Process & Other Non-Indexed Citations, Ovid MEDLINE(R) Daily, Ovid MEDLINE(R) and Ovid OLDMEDLINE(R) <1946 to Present>

### Search strategy

- 1 Shoulder Fractures/rh, su, th [Rehabilitation, Surgery, Therapy] (1636)
- 2 proximal humeral fracture\*.mp. [mp=ti, ab, tx, ct, hw, sa, ot, nm, kf, px, rx, ui] (2127)
- 3 (treatment or therapy or surger\* or operat\* or rehab\*).mp. [mp=ti, ab, tx, ct, hw, sa, ot, nm, kf, px, rx, ui] (9839666)
- 4 Therapeutics/ (7529)
- 5 exp Rehabilitation/ (147882)
- 6 exp General Surgery/ (33683)
- 7 3 or 4 or 5 or 6 (9893677)
- 8 2 and 7 (1907)
- 9 1 or 8 (3131)
- 10 exp Cohort Studies/ (1338909)
- 11 cohort.mp. [mp=ti, ab, tx, ct, hw, sa, ot, nm, kf, px, rx, ui] (1011511)
- 12 exp Prospective Studies/ (363048)
- 13 prospective.mp. [mp=ti, ab, tx, ct, hw, sa, ot, nm, kf, px, rx, ui] (1290923)
- 14 exp Retrospective Studies/ (486416)
- 15 retrospective.mp. [mp=ti, ab, tx, ct, hw, sa, ot, nm, kf, px, rx, ui] (1125906)
- 16 10 or 11 or 12 or 13 or 14 or 15 (3068198)
- 17 9 and 16 (1249)
- 18 limit 9 to (controlled clinical trial or randomized controlled trial) [Limit not valid in Journals@Ovid,Your Journals@Ovid,The Joanna Briggs Institute EBP Database -; records were retained] (1385)
- 19 limit 9 to “therapy (maximizes sensitivity)” [Limit not valid in Journals@Ovid,Your Journals@Ovid,The Joanna Briggs Institute EBP Database -; records were retained] (1671)
- 20 exp Clinical Trials as Topic/ (279112)
- 21 limit 9 to (clinical trial or controlled clinical trial or meta analysis or multicenter study or randomized controlled trial) [Limit not valid in Journals@Ovid,Your Journals@Ovid,The Joanna Briggs Institute EBP Database -; records were retained] (1461)
- 22 Double-Blind Method/ (125256)
- 23 Comparative Study/ (1672742)
- 24 exp Treatment Outcome/ (642218)
- 25 exp Epidemiologic Research Design/ (841613)
- 26 exp Research Design/ (334428)
- 27 Evidence-Based Medicine/ (53566)
- 28 exp Evaluation Studies/ (192295)
- 29 (placebo or random or (single blind\* or double blind\* or triple blind\*)).tw. (1316582)
- 30 20 or 22 or 23 or 24 or 25 or 26 or 27 or 28 or 29 (4291061)
- 31 9 and 30 (806)
- 32 17 or 18 or 19 or 21 or 31 (2391)
- 33 limit 32 to “middle aged (45 plus years)” [Limit not valid in Journals@Ovid,Your Journals@Ovid,The Joanna Briggs Institute EBP Database -; records were retained] (2120)
- 34 limit 33 to meta analysis [Limit not valid in Journals@Ovid,Your Journals@Ovid,The Joanna Briggs Institute EBP Database -; records were retained] (1339)
- 35 33 not 34 (781)
